# Supplementary material for: Variants in the FTO and CDKAL1 loci have recessive effects on risk of obesity and type 2 diabetes, respectively
Source: PubMed Central journal article supplement (PMC4869698; doi:10.1007/s00125-016-3908-5), 2016-03-10
Supplement: 125_2016_3908_MOESM1_ESM.pdf [file 125_2016_3908_MOESM1_ESM.pdf]

**ESM Table 1.** Summary data of UK Biobank participants included in study. ‘SD’ = standard deviation, ‘Min’ = minimum characteristic value, ‘Max’ = maximum characteristic value.

| Characteristic | Subject Group    | Summary Statistics within White British Subject Group |        |      |       |       |               |               |               |               |
|----------------|------------------|-------------------------------------------------------|--------|------|-------|-------|---------------|---------------|---------------|---------------|
|                |                  | N                                                     | Mean   | SD   | Min   | Max   | Q1 Mean (SD)  | Q2 Mean (SD)  | Q3 Mean (SD)  | Q4 Mean (SD)  |
| N              | All              | 120,286                                               | -      | -    | -     | -     | -             | -             | -             | -             |
|                | Males            | 56,936                                                | -      | -    | -     | -     | -             | -             | -             | -             |
|                | Females          | 63,350                                                | -      | -    | -     | -     | -             | -             | -             | -             |
|                | T2D Cases        | 4,040                                                 | -      | -    | -     | -     | -             | -             | -             | -             |
|                | T2D Cases Male   | 2,711                                                 | -      | -    | -     | -     | -             | -             | -             | -             |
|                | T2D Cases Female | 1,329                                                 | -      | -    | -     | -     | -             | -             | -             | -             |
| Age (years)    | All              | 120,286                                               | 56.92  | 7.94 | 40    | 73    | 46.22 (3.31)  | 55.16 (2.00)  | 61.07 (1.36)  | 66.33 (1.76)  |
|                | Males            | 56,936                                                | 57.26  | 8.03 | 40    | 73    | 46.14 (3.33)  | 55.78 (2.29)  | 61.99 (1.40)  | 66.91 (1.49)  |
|                | Females          | 63,350                                                | 56.62  | 7.85 | 40    | 70    | 46.29 (3.30)  | 55.14 (2.00)  | 61.06 (1.36)  | 66.29 (1.75)  |
|                | T2D Cases        | 4,040                                                 | 61.11  | 6.18 | 40    | 70    | 52.34 (4.06)  | 60.27 (1.38)  | 64.52 (1.11)  | 68.08 (0.90)  |
|                | T2D Cases Male   | 2,711                                                 | 61.32  | 6.08 | 40    | 70    | 53.16 (4.16)  | 60.66 (1.12)  | 64.54 (1.11)  | 68.10 (0.91)  |
|                | T2D Cases Female | 1,329                                                 | 60.69  | 6.35 | 40    | 70    | 52.23 (4.16)  | 60.22 (1.38)  | 64.46 (1.11)  | 68.03 (0.88)  |
| BMI            | All              | 119,688                                               | 27.53  | 4.82 | 12.12 | 74.68 | 22.28 (1.51)  | 25.54 (0.75)  | 28.31 (0.90)  | 34.00 (3.91)  |
|                | Males            | 56,668                                                | 27.95  | 4.31 | 15.25 | 63.44 | 23.17 (1.51)  | 26.24 (0.68)  | 28.70 (0.79)  | 33.67 (3.46)  |
|                | Females          | 63,020                                                | 27.15  | 5.21 | 12.12 | 74.68 | 21.67 (1.41)  | 24.85 (0.76)  | 27.82 (1.02)  | 34.28 (4.27)  |
|                | T2D Cases        | 4,003                                                 | 32.12  | 5.76 | 17.71 | 74.68 | 25.70 (1.90)  | 29.74 (0.89)  | 33.16 (1.16)  | 38.88 (4.36)  |
|                | T2D Cases Male   | 2,686                                                 | 31.6   | 5.12 | 17.83 | 57.35 | 25.80 (1.82)  | 29.55 (0.80)  | 32.59 (1.02)  | 38.46 (3.74)  |
|                | T2D Cases Female | 1,317                                                 | 33.17  | 6.77 | 17.71 | 74.68 | 25.52 (2.04)  | 30.27 (1.14)  | 34.58 (1.41)  | 42.34 (4.77)  |
| Height (cm)    | All              | 120,085                                               | 168.78 | 9.2  | 75    | 205   | 157.73 (3.67) | 165.46 (1.70) | 171.94 (2.01) | 181.88 (4.15) |
|                | Males            | 56,833                                                | 175.69 | 6.75 | 75    | 205   | 167.44 (3.46) | 174.02 (1.41) | 178.41 (1.12) | 184.52 (3.41) |
|                | Females          | 63,252                                                | 162.57 | 6.19 | 126   | 190   | 154.85 (3.03) | 160.54 (1.11) | 164.86 (1.39) | 171.16 (3.10) |
|                | T2D Cases        | 4,029                                                 | 170.17 | 8.98 | 143   | 196   | 158.27 (3.98) | 167.86 (2.28) | 174.38 (1.68) | 181.83 (3.57) |
|                | T2D Cases Male   | 2,704                                                 | 174.52 | 6.64 | 153   | 196   | 166.40 (3.45) | 172.53 (1.11) | 176.84 (1.39) | 183.38 (3.27) |
|                | T2D Cases Female | 1,325                                                 | 161.29 | 6.12 | 143   | 183   | 153.74 (2.97) | 159.55 (1.18) | 163.29 (1.10) | 169.56 (3.09) |
