# Supplementary material for: Variants in the FTO and CDKAL1 loci have recessive effects on risk of obesity and type 2 diabetes, respectively
Source: PubMed Central journal article supplement (PMC4869698; doi:10.1007/s00125-016-3908-5), 2016-03-10
Supplement: 125_2016_3908_MOESM4_ESM.pdf [file 125_2016_3908_MOESM4_ESM.pdf]

**ESM Table 4.** Summary statistics for 72 published BMI SNPs tested for deviation from additivity for BMI. Results from the additive and recessive models are also presented. 'SE' = standard error.

| SNP        | Locus              | Effect/Other Allele | Additive Model |       |         | Dominant Model |       |         | Recessive Model |       |         | Dominance Deviation |       |         |
|------------|--------------------|---------------------|----------------|-------|---------|----------------|-------|---------|-----------------|-------|---------|---------------------|-------|---------|
|            |                    |                     | BETA           | SE    | P       | BETA           | SE    | P       | BETA            | SE    | P       | BETA                | SE    | P       |
| rs1421085  | <i>FTO</i>         | C/T                 | 0.076          | 0.004 | 1.6E-75 | 0.083          | 0.006 | 1.6E-43 | 0.130           | 0.008 | 4.7E-62 | -0.025              | 0.006 | 3.5E-05 |
| rs758747   | <i>NLRC3</i>       | T/C                 | 0.015          | 0.005 | 1.8E-03 | 0.011          | 0.006 | 0.066   | 0.045           | 0.011 | 6.8E-05 | -0.019              | 0.007 | 0.010   |
| rs1000940  | <i>RABEP1</i>      | G/A                 | 0.011          | 0.004 | 0.013   | 0.019          | 0.006 | 9.6E-04 | -0.002          | 0.01  | 0.863   | 0.017               | 0.007 | 0.012   |
| rs11126666 | <i>KCNK3</i>       | A/G                 | 0.002          | 0.005 | 0.679   | -0.003         | 0.006 | 0.584   | 0.025           | 0.012 | 0.032   | -0.019              | 0.008 | 0.015   |
| rs3101336  | <i>NEGR1</i>       | C/T                 | 0.027          | 0.004 | 7.0E-11 | 0.051          | 0.008 | 1.4E-10 | 0.027           | 0.006 | 6.6E-06 | 0.014               | 0.006 | 0.023   |
| rs3810291  | <i>ZC3H4</i>       | A/G                 | 0.028          | 0.004 | 1.6E-10 | 0.028          | 0.009 | 3.0E-03 | 0.039           | 0.006 | 2.7E-11 | -0.014              | 0.007 | 0.037   |
| rs10182181 | <i>ADCY3</i>       | G/A                 | 0.033          | 0.004 | 5.7E-16 | 0.037          | 0.007 | 2.2E-08 | 0.052           | 0.007 | 1.8E-14 | -0.011              | 0.006 | 0.058   |
| rs10733682 | <i>LMX1B</i>       | A/G                 | 0.019          | 0.004 | 8.6E-06 | 0.032          | 0.007 | 2.2E-06 | 0.018           | 0.007 | 0.014   | 0.011               | 0.006 | 0.062   |
| rs4740619  | <i>C9orf93</i>     | T/C                 | 0.017          | 0.004 | 4.3E-05 | 0.016          | 0.007 | 0.025   | 0.027           | 0.006 | 1.7E-05 | -0.009              | 0.006 | 0.112   |
| rs17405819 | <i>HNF4G</i>       | T/C                 | 0.014          | 0.004 | 1.2E-03 | 0.033          | 0.010 | 1.0E-03 | 0.013           | 0.006 | 0.020   | 0.010               | 0.007 | 0.139   |
| rs1528435  | <i>UBE2E3</i>      | T/C                 | 0.014          | 0.004 | 6.7E-04 | 0.013          | 0.008 | 0.113   | 0.022           | 0.006 | 2.6E-04 | -0.009              | 0.006 | 0.164   |
| rs12940622 | <i>RPTOR</i>       | G/A                 | 0.017          | 0.004 | 4.0E-05 | 0.018          | 0.007 | 0.017   | 0.026           | 0.006 | 2.9E-05 | -0.008              | 0.006 | 0.188   |
| rs6804842  | <i>RARB</i>        | G/A                 | 0.009          | 0.004 | 0.037   | 0.006          | 0.008 | 0.431   | 0.015           | 0.006 | 0.014   | -0.008              | 0.006 | 0.189   |
| rs3888190  | <i>ATP2A1</i>      | A/C                 | 0.024          | 0.004 | 7.8E-09 | 0.026          | 0.006 | 1.3E-05 | 0.041           | 0.008 | 2.1E-07 | -0.008              | 0.006 | 0.210   |
| rs7599312  | <i>ERBB4</i>       | G/A                 | 0.020          | 0.005 | 3.6E-05 | 0.020          | 0.012 | 0.085   | 0.025           | 0.006 | 1.8E-05 | -0.009              | 0.008 | 0.213   |
| rs2033732  | <i>RALYL</i>       | C/T                 | 0.002          | 0.005 | 0.689   | 0.014          | 0.012 | 0.224   | -0.001          | 0.006 | 0.916   | 0.009               | 0.008 | 0.213   |
| rs12566985 | <i>FPGT-TNNI3K</i> | G/A                 | 0.011          | 0.004 | 6.1E-03 | 0.010          | 0.006 | 0.095   | 0.021           | 0.007 | 3.6E-03 | -0.007              | 0.006 | 0.216   |
| rs13078960 | <i>CADM2</i>       | G/T                 | 0.024          | 0.005 | 3.6E-06 | 0.024          | 0.006 | 6.6E-05 | 0.053           | 0.015 | 3.1E-04 | -0.010              | 0.009 | 0.254   |
| rs13191362 | <i>PARK2</i>       | A/G                 | 0.027          | 0.006 | 1.3E-05 | 0.071          | 0.023 | 2.4E-03 | 0.027           | 0.007 | 8.8E-05 | 0.015               | 0.013 | 0.267   |
| rs16951275 | <i>MAP2K5</i>      | T/C                 | 0.032          | 0.005 | 6.2E-11 | 0.041          | 0.013 | 1.6E-03 | 0.038           | 0.006 | 9.0E-11 | -0.009              | 0.008 | 0.295   |
| rs2121279  | <i>LRP1B</i>       | T/C                 | 0.006          | 0.006 | 0.325   | 0.008          | 0.007 | 0.226   | -0.01           | 0.024 | 0.668   | 0.013               | 0.013 | 0.312   |
| rs543874   | <i>SEC16B</i>      | G/A                 | 0.049          | 0.005 | 2.2E-22 | 0.057          | 0.006 | 2.3E-21 | 0.069           | 0.014 | 1.0E-06 | 0.009               | 0.009 | 0.316   |

|            |           |     |       |       |         |       |       |         |       |       |         |        |       |       |
|------------|-----------|-----|-------|-------|---------|-------|-------|---------|-------|-------|---------|--------|-------|-------|
| rs7243357  | GRP       | T/G | 0.012 | 0.005 | 0.027   | 0.035 | 0.017 | 0.041   | 0.011 | 0.006 | 0.073   | 0.010  | 0.010 | 0.317 |
| rs10132280 | STXBP6    | C/A | 0.020 | 0.005 | 8.0E-06 | 0.025 | 0.011 | 0.020   | 0.026 | 0.006 | 8.9E-06 | -0.006 | 0.007 | 0.362 |
| rs12429545 | OLFM4     | A/G | 0.028 | 0.006 | 6.9E-06 | 0.028 | 0.007 | 4.0E-05 | 0.068 | 0.023 | 3.5E-03 | -0.012 | 0.013 | 0.364 |
| rs6477694  | EPB41L4B  | C/T | 0.007 | 0.004 | 0.084   | 0.007 | 0.006 | 0.260   | 0.016 | 0.009 | 0.063   | -0.006 | 0.006 | 0.378 |
| rs4256980  | TRIM66    | G/C | 0.020 | 0.004 | 2.3E-06 | 0.036 | 0.009 | 6.9E-05 | 0.022 | 0.006 | 1.4E-04 | 0.006  | 0.006 | 0.388 |
| rs2650492  | SBK1      | A/G | 0.018 | 0.005 | 7.2E-05 | 0.019 | 0.006 | 1.1E-03 | 0.034 | 0.01  | 9.7E-04 | -0.006 | 0.007 | 0.400 |
| rs11165643 | PTBP2     | T/C | 0.016 | 0.004 | 1.0E-04 | 0.027 | 0.008 | 4.5E-04 | 0.018 | 0.006 | 3.4E-03 | 0.005  | 0.006 | 0.401 |
| rs205262   | C6orf106  | G/A | 0.028 | 0.005 | 1.6E-09 | 0.034 | 0.006 | 4.7E-09 | 0.037 | 0.011 | 8.9E-04 | 0.006  | 0.007 | 0.430 |
| rs11727676 | HHIP      | T/C | 0.003 | 0.007 | 0.676   | 0.026 | 0.030 | 0.382   | 0.002 | 0.007 | 0.816   | 0.013  | 0.017 | 0.441 |
| rs2245368  | PMS2L11   | C/T | 0.021 | 0.005 | 8.4E-05 | 0.025 | 0.006 | 7.0E-05 | 0.026 | 0.017 | 0.141   | 0.008  | 0.010 | 0.447 |
| rs2820292  | NAV1      | C/A | 0.019 | 0.004 | 3.6E-06 | 0.023 | 0.007 | 1.8E-03 | 0.027 | 0.006 | 1.4E-05 | -0.004 | 0.006 | 0.450 |
| rs9581854  | MTIF3     | T/C | 0.014 | 0.005 | 8.1E-03 | 0.017 | 0.006 | 6.0E-03 | 0.014 | 0.016 | 0.390   | 0.007  | 0.010 | 0.456 |
| rs11191560 | NT5C2     | C/T | 0.027 | 0.008 | 4.6E-04 | 0.029 | 0.008 | 3.4E-04 | 0.025 | 0.037 | 0.499   | 0.015  | 0.020 | 0.460 |
| rs11057405 | CLIP1     | G/A | 0.030 | 0.007 | 4.2E-06 | 0.039 | 0.027 | 0.145   | 0.033 | 0.007 | 3.6E-06 | -0.010 | 0.015 | 0.498 |
| rs10938397 | GNPDA2    | G/A | 0.030 | 0.004 | 5.9E-13 | 0.036 | 0.006 | 7.9E-09 | 0.044 | 0.007 | 1.8E-09 | -0.004 | 0.006 | 0.507 |
| rs7138803  | BCDIN3D   | A/G | 0.034 | 0.004 | 1.7E-15 | 0.043 | 0.006 | 2.5E-13 | 0.045 | 0.008 | 7.1E-08 | 0.004  | 0.006 | 0.509 |
| rs7141420  | NRXN3     | T/C | 0.018 | 0.004 | 2.5E-05 | 0.021 | 0.007 | 2.5E-03 | 0.025 | 0.007 | 1.3E-04 | -0.004 | 0.006 | 0.526 |
| rs6567160  | MC4R      | C/T | 0.054 | 0.005 | 1.0E-28 | 0.062 | 0.006 | 3.6E-26 | 0.081 | 0.013 | 2.3E-10 | 0.005  | 0.008 | 0.533 |
| rs13021737 | TMEM18    | G/A | 0.058 | 0.005 | 1.8E-26 | 0.109 | 0.017 | 4.2E-10 | 0.062 | 0.006 | 2.4E-23 | 0.006  | 0.010 | 0.539 |
| rs11688816 | EHBP1     | G/A | 0.013 | 0.004 | 1.4E-03 | 0.016 | 0.007 | 0.032   | 0.019 | 0.006 | 2.7E-03 | -0.004 | 0.006 | 0.555 |
| rs2365389  | FHIT      | C/T | 0.029 | 0.004 | 3.8E-12 | 0.044 | 0.008 | 1.6E-08 | 0.035 | 0.006 | 1.2E-08 | 0.003  | 0.006 | 0.563 |
| rs12286929 | CADM1     | G/A | 0.010 | 0.004 | 0.011   | 0.012 | 0.007 | 0.089   | 0.016 | 0.006 | 0.016   | -0.003 | 0.006 | 0.575 |
| rs1016287  | LINC01122 | T/C | 0.019 | 0.004 | 2.2E-05 | 0.021 | 0.006 | 2.9E-04 | 0.033 | 0.01  | 1.0E-03 | -0.004 | 0.007 | 0.592 |
| rs13107325 | SLC39A8   | T/C | 0.040 | 0.008 | 3.8E-07 | 0.040 | 0.008 | 1.1E-06 | 0.094 | 0.04  | 0.020   | -0.011 | 0.022 | 0.593 |
| rs29941    | KCTD15    | G/A | 0.017 | 0.004 | 6.4E-05 | 0.023 | 0.009 | 0.015   | 0.022 | 0.006 | 1.4E-04 | -0.003 | 0.007 | 0.612 |
| rs17094222 | HIF1AN    | C/T | 0.015 | 0.005 | 4.8E-03 | 0.015 | 0.006 | 0.013   | 0.03  | 0.015 | 0.040   | -0.005 | 0.009 | 0.615 |
| rs2176598  | HSD17B12  | T/C | 0.023 | 0.005 | 1.3E-06 | 0.025 | 0.006 | 1.7E-05 | 0.041 | 0.012 | 6.6E-04 | -0.004 | 0.008 | 0.630 |

|            |                |     |       |       |         |       |       |         |       |       |         |        |       |       |
|------------|----------------|-----|-------|-------|---------|-------|-------|---------|-------|-------|---------|--------|-------|-------|
| rs1167827  | <i>HIP1</i>    | G/A | 0.020 | 0.004 | 1.7E-06 | 0.025 | 0.007 | 6.3E-04 | 0.027 | 0.006 | 1.6E-05 | -0.003 | 0.006 | 0.632 |
| rs2112347  | <i>POCS</i>    | T/G | 0.026 | 0.004 | 6.1E-10 | 0.036 | 0.009 | 3.2E-05 | 0.033 | 0.006 | 1.3E-08 | -0.003 | 0.006 | 0.632 |
| rs12446632 | <i>GPRC5B</i>  | G/A | 0.028 | 0.006 | 2.1E-06 | 0.041 | 0.020 | 0.047   | 0.031 | 0.007 | 2.9E-06 | -0.005 | 0.012 | 0.658 |
| rs16851483 | <i>RASA2</i>   | T/G | 0.028 | 0.008 | 7.8E-04 | 0.028 | 0.009 | 1.3E-03 | 0.069 | 0.044 | 0.116   | -0.010 | 0.024 | 0.673 |
| rs3849570  | <i>GBE1</i>    | A/C | 0.012 | 0.004 | 5.9E-03 | 0.013 | 0.006 | 0.024   | 0.02  | 0.009 | 0.024   | -0.003 | 0.006 | 0.685 |
| rs2207139  | <i>TFAP2B</i>  | G/A | 0.039 | 0.005 | 1.7E-12 | 0.041 | 0.006 | 3.8E-11 | 0.072 | 0.017 | 3.9E-05 | -0.004 | 0.010 | 0.701 |
| rs3817334  | <i>MTCH2</i>   | T/C | 0.031 | 0.004 | 1.7E-13 | 0.037 | 0.006 | 6.3E-10 | 0.045 | 0.008 | 5.2E-09 | -0.002 | 0.006 | 0.729 |
| rs12401738 | <i>FUBP1</i>   | A/G | 0.012 | 0.004 | 4.7E-03 | 0.016 | 0.006 | 8.3E-03 | 0.015 | 0.008 | 0.060   | 0.002  | 0.006 | 0.732 |
| rs17724992 | <i>PGPEP1</i>  | A/G | 0.023 | 0.005 | 1.3E-06 | 0.033 | 0.011 | 3.8E-03 | 0.027 | 0.006 | 4.7E-06 | -0.002 | 0.007 | 0.745 |
| rs3736485  | <i>DMXL2</i>   | A/G | 0.013 | 0.004 | 2.3E-03 | 0.015 | 0.006 | 0.017   | 0.019 | 0.007 | 9.3E-03 | -0.002 | 0.006 | 0.768 |
| rs9400239  | <i>FOXO3</i>   | C/T | 0.016 | 0.005 | 3.3E-04 | 0.027 | 0.010 | 8.8E-03 | 0.018 | 0.006 | 1.6E-03 | 0.002  | 0.007 | 0.777 |
| rs2287019  | <i>QPCTL</i>   | C/T | 0.035 | 0.005 | 7.8E-11 | 0.056 | 0.017 | 7.6E-04 | 0.039 | 0.006 | 3.8E-10 | -0.003 | 0.010 | 0.778 |
| rs17024393 | <i>GNAT2</i>   | C/T | 0.070 | 0.013 | 5.5E-08 | 0.071 | 0.013 | 8.1E-08 | 0.165 | 0.108 | 0.126   | -0.015 | 0.055 | 0.793 |
| rs11030104 | <i>BDNF</i>    | A/G | 0.040 | 0.005 | 7.0E-15 | 0.063 | 0.015 | 1.8E-05 | 0.045 | 0.006 | 1.2E-13 | -0.002 | 0.009 | 0.794 |
| rs1808579  | <i>C18orf8</i> | C/T | 0.021 | 0.004 | 1.9E-07 | 0.028 | 0.007 | 4.5E-05 | 0.029 | 0.007 | 1.1E-05 | -0.001 | 0.006 | 0.843 |
| rs11583200 | <i>ELAVL4</i>  | C/T | 0.019 | 0.004 | 4.3E-06 | 0.025 | 0.006 | 4.2E-05 | 0.027 | 0.008 | 8.8E-04 | 0.001  | 0.006 | 0.860 |
| rs7899106  | <i>GRID1</i>   | G/A | 0.023 | 0.009 | 0.014   | 0.024 | 0.010 | 0.015   | 0.035 | 0.058 | 0.550   | 0.005  | 0.031 | 0.870 |
| rs11847697 | <i>PRKD1</i>   | T/C | 0.013 | 0.010 | 0.186   | 0.013 | 0.010 | 0.198   | 0.035 | 0.068 | 0.609   | -0.005 | 0.035 | 0.886 |
| rs1516725  | <i>ETV5</i>    | C/T | 0.032 | 0.006 | 5.5E-08 | 0.055 | 0.022 | 0.011   | 0.035 | 0.007 | 1.4E-07 | -0.002 | 0.012 | 0.898 |
| rs1928295  | <i>TLR4</i>    | T/C | 0.010 | 0.004 | 0.016   | 0.014 | 0.007 | 0.055   | 0.012 | 0.006 | 0.045   | 0.001  | 0.006 | 0.931 |
| rs10968576 | <i>LINGO2</i>  | G/A | 0.024 | 0.004 | 5.4E-08 | 0.028 | 0.006 | 9.2E-07 | 0.036 | 0.009 | 1.7E-04 | 0.000  | 0.007 | 0.960 |
| rs12885454 | <i>PRKD1</i>   | C/A | 0.014 | 0.004 | 7.1E-04 | 0.021 | 0.009 | 0.015   | 0.018 | 0.006 | 2.6E-03 | 0.000  | 0.006 | 0.967 |
| rs657452   | <i>AGBL4</i>   | A/G | 0.014 | 0.004 | 8.4E-04 | 0.018 | 0.006 | 3.7E-03 | 0.02  | 0.008 | 0.012   | 0.000  | 0.006 | 0.997 |
