# Supplementary material for: Variants in the FTO and CDKAL1 loci have recessive effects on risk of obesity and type 2 diabetes, respectively
Source: PubMed Central journal article supplement (PMC4869698; doi:10.1007/s00125-016-3908-5), 2016-03-10
Supplement: 125_2016_3908_MOESM5_ESM.pdf [file 125_2016_3908_MOESM5_ESM.pdf]

**ESM Table 5.** Summary statistics for 66 published Type-2 diabetes SNPs tested for deviation from additivity for Type-2 diabetes risk. Results from the additive and recessive models are also presented. 'SE' = standard error.

| SNP        | Locus                | Effect/Other Allele | Additive Model |       |         | Dominant Model |       |         | Recessive Model |       |         | Dominance Deviation |       |         |
|------------|----------------------|---------------------|----------------|-------|---------|----------------|-------|---------|-----------------|-------|---------|---------------------|-------|---------|
|            |                      |                     | Odds Ratio     | SE    | P       | Odds Ratio     | SE    | P       | Odds Ratio      | SE    | P       | Odds Ratio          | SE    | P       |
| rs7756992  | <i>CDKAL1</i>        | G/A                 | 1.153          | 0.025 | 1.3E-08 | 1.127          | 0.032 | 2.3E-04 | 1.439           | 0.055 | 2.6E-11 | 0.874               | 0.038 | 4.6E-04 |
| rs11257655 | <i>CDC123/CAMK1D</i> | T/C                 | 1.118          | 0.027 | 4.4E-05 | 1.162          | 0.033 | 5.3E-06 | 1.057           | 0.077 | 0.471   | 1.104               | 0.047 | 0.036   |
| rs6878122  | <i>ZBED3</i>         | G/A                 | 1.035          | 0.024 | 0.153   | 1.071          | 0.033 | 0.034   | 0.981           | 0.054 | 0.713   | 1.073               | 0.037 | 0.058   |
| rs6795735  | <i>ADAMTS9</i>       | C/T                 | 1.008          | 0.023 | 0.733   | 0.960          | 0.043 | 0.349   | 1.042           | 0.034 | 0.223   | 0.940               | 0.034 | 0.067   |
| rs12242953 | <i>VPS26A</i>        | G/A                 | 1.002          | 0.047 | 0.966   | 0.715          | 0.205 | 0.100   | 1.020           | 0.050 | 0.697   | 0.817               | 0.113 | 0.074   |
| rs12571751 | <i>ZMIZ1</i>         | A/G                 | 1.080          | 0.023 | 7.7E-04 | 1.067          | 0.040 | 0.105   | 1.140           | 0.035 | 1.6E-04 | 0.947               | 0.033 | 0.094   |
| rs10842994 | <i>KLHDC5</i>        | C/T                 | 1.076          | 0.029 | 0.012   | 1.286          | 0.093 | 6.8E-03 | 1.065           | 0.034 | 0.065   | 1.096               | 0.055 | 0.095   |
| rs516946   | <i>ANK1</i>          | C/T                 | 1.091          | 0.027 | 1.5E-03 | 1.052          | 0.072 | 0.482   | 1.125           | 0.033 | 3.9E-04 | 0.929               | 0.046 | 0.108   |
| rs7569522  | <i>RBMS1</i>         | A/G                 | 1.062          | 0.023 | 0.011   | 1.116          | 0.037 | 2.8E-03 | 1.044           | 0.040 | 0.287   | 1.054               | 0.033 | 0.109   |
| rs2075423  | <i>PROX1</i>         | G/T                 | 1.085          | 0.025 | 9.8E-04 | 1.201          | 0.056 | 9.8E-04 | 1.080           | 0.033 | 0.019   | 1.058               | 0.038 | 0.136   |
| rs3734621  | <i>KCNK16</i>        | C/A                 | 1.129          | 0.069 | 0.078   | 1.148          | 0.070 | 0.049   | 0.303           | 1.009 | 0.237   | 2.103               | 0.509 | 0.144   |
| rs16927668 | <i>PTPRD</i>         | T/C                 | 1.014          | 0.029 | 0.630   | 0.999          | 0.034 | 0.982   | 1.123           | 0.080 | 0.145   | 0.932               | 0.049 | 0.154   |
| rs1359790  | <i>SPRY2</i>         | G/A                 | 1.102          | 0.026 | 1.7E-04 | 1.093          | 0.061 | 0.142   | 1.139           | 0.032 | 6.2E-05 | 0.947               | 0.040 | 0.177   |
| rs4812829  | <i>HNF4A</i>         | A/G                 | 1.097          | 0.031 | 2.5E-03 | 1.122          | 0.035 | 9.9E-04 | 1.044           | 0.102 | 0.676   | 1.084               | 0.060 | 0.178   |
| rs7955901  | <i>TSPAN8/LGR5</i>   | C/T                 | 1.010          | 0.023 | 0.683   | 1.038          | 0.035 | 0.288   | 0.979           | 0.041 | 0.605   | 1.045               | 0.033 | 0.178   |
| rs243088   | <i>BCL11A</i>        | T/A                 | 1.060          | 0.023 | 0.011   | 1.051          | 0.036 | 0.168   | 1.118           | 0.039 | 4.5E-03 | 0.957               | 0.033 | 0.184   |
| rs7903146  | <i>TCF7L2</i>        | T/C                 | 1.400          | 0.024 | 7.3E-45 | 1.524          | 0.033 | 1.3E-37 | 1.592           | 0.050 | 9.5E-21 | 1.048               | 0.036 | 0.185   |
| rs7202877  | <i>BCAR1</i>         | T/G                 | 1.147          | 0.041 | 8.3E-04 | 1.042          | 0.177 | 0.815   | 1.168           | 0.044 | 4.0E-04 | 0.881               | 0.098 | 0.195   |
| rs1801282  | <i>PPARG</i>         | C/G                 | 1.116          | 0.036 | 2.4E-03 | 1.447          | 0.155 | 0.017   | 1.111           | 0.040 | 8.1E-03 | 1.113               | 0.085 | 0.211   |
| rs3802177  | <i>SLC30A8</i>       | G/A                 | 1.131          | 0.025 | 1.2E-06 | 1.276          | 0.060 | 5.6E-05 | 1.137           | 0.032 | 7.0E-05 | 1.049               | 0.040 | 0.229   |
| rs17301514 | <i>ST6GAL1</i>       | A/G                 | 1.039          | 0.037 | 0.305   | 1.052          | 0.040 | 0.205   | 0.906           | 0.165 | 0.549   | 1.108               | 0.090 | 0.258   |
| rs7177055  | <i>HMG20A</i>        | A/G                 | 1.092          | 0.026 | 7.0E-04 | 1.089          | 0.062 | 0.172   | 1.123           | 0.032 | 3.6E-04 | 0.955               | 0.041 | 0.262   |

|            |                       |     |       |       |         |       |       |         |       |       |         |       |       |       |
|------------|-----------------------|-----|-------|-------|---------|-------|-------|---------|-------|-------|---------|-------|-------|-------|
| rs10278336 | <i>GCK</i>            | A/G | 1.097 | 0.023 | 7.0E-05 | 1.105 | 0.043 | 0.021   | 1.145 | 0.034 | 5.8E-05 | 0.964 | 0.034 | 0.269 |
| rs10830963 | <i>MTNR1B</i>         | G/C | 1.113 | 0.025 | 1.9E-05 | 1.150 | 0.032 | 1.6E-05 | 1.127 | 0.058 | 0.040   | 1.044 | 0.039 | 0.272 |
| rs2261181  | <i>HMGA2</i>          | T/C | 1.203 | 0.037 | 5.3E-07 | 1.202 | 0.040 | 4.8E-06 | 1.606 | 0.141 | 8.1E-04 | 0.917 | 0.080 | 0.277 |
| rs4299828  | <i>ZFAND3</i>         | A/G | 1.021 | 0.029 | 0.470   | 0.962 | 0.083 | 0.637   | 1.036 | 0.034 | 0.300   | 0.946 | 0.051 | 0.278 |
| rs17168486 | <i>DGKB</i>           | T/C | 1.122 | 0.029 | 9.1E-05 | 1.122 | 0.034 | 8.2E-04 | 1.309 | 0.086 | 1.6E-03 | 0.946 | 0.052 | 0.292 |
| rs2334499  | <i>DUSP8</i>          | T/C | 1.043 | 0.023 | 0.071   | 1.074 | 0.035 | 0.041   | 1.034 | 0.042 | 0.436   | 1.033 | 0.033 | 0.326 |
| rs2943640  | <i>IRS1</i>           | C/A | 1.057 | 0.024 | 0.021   | 1.051 | 0.050 | 0.318   | 1.084 | 0.033 | 0.013   | 0.967 | 0.036 | 0.355 |
| rs10811661 | <i>CDKN2A/B</i>       | T/C | 1.214 | 0.032 | 1.3E-09 | 1.527 | 0.113 | 1.8E-04 | 1.223 | 0.036 | 2.1E-08 | 1.062 | 0.065 | 0.355 |
| rs163184   | <i>KCNQ1</i>          | G/T | 1.114 | 0.023 | 2.7E-06 | 1.177 | 0.038 | 1.6E-05 | 1.134 | 0.038 | 9.0E-04 | 1.030 | 0.033 | 0.361 |
| rs13389219 | <i>GRB14</i>          | C/T | 1.094 | 0.024 | 1.5E-04 | 1.171 | 0.047 | 7.6E-04 | 1.102 | 0.033 | 3.5E-03 | 1.031 | 0.035 | 0.371 |
| rs4458523  | <i>WFS1</i>           | G/T | 1.073 | 0.023 | 2.7E-03 | 1.077 | 0.045 | 0.096   | 1.108 | 0.033 | 2.2E-03 | 0.970 | 0.034 | 0.372 |
| rs2796441  | <i>TLE1</i>           | G/A | 1.055 | 0.023 | 0.022   | 1.105 | 0.043 | 0.021   | 1.054 | 0.034 | 0.125   | 1.030 | 0.033 | 0.376 |
| rs11717195 | <i>ADCY5</i>          | T/C | 1.058 | 0.027 | 0.036   | 1.149 | 0.071 | 0.052   | 1.055 | 0.033 | 0.101   | 1.039 | 0.045 | 0.391 |
| rs9936385  | <i>FTO</i>            | C/T | 1.152 | 0.023 | 1.1E-09 | 1.213 | 0.034 | 2.2E-08 | 1.195 | 0.043 | 3.1E-05 | 1.029 | 0.033 | 0.397 |
| rs12427353 | <i>HNF1A (TCF1)</i>   | G/C | 1.011 | 0.030 | 0.713   | 1.082 | 0.091 | 0.389   | 1.003 | 0.034 | 0.926   | 1.044 | 0.054 | 0.425 |
| rs1552224  | <i>ARAP1 (CENTD2)</i> | A/C | 1.163 | 0.033 | 5.0E-06 | 1.412 | 0.121 | 4.5E-03 | 1.168 | 0.037 | 2.6E-05 | 1.055 | 0.069 | 0.437 |
| rs11634397 | <i>ZFAND6</i>         | G/A | 1.005 | 0.024 | 0.848   | 1.035 | 0.051 | 0.504   | 0.995 | 0.033 | 0.865   | 1.028 | 0.036 | 0.449 |
| rs10401969 | <i>CILP2</i>          | C/T | 1.084 | 0.042 | 0.054   | 1.081 | 0.045 | 0.082   | 1.315 | 0.190 | 0.149   | 0.929 | 0.104 | 0.478 |
| rs6819243  | <i>MAEA</i>           | C/T | 1.060 | 0.074 | 0.427   | 1.056 | 0.075 | 0.472   | 1.648 | 0.598 | 0.404   | 0.817 | 0.308 | 0.511 |
| rs1111875  | <i>HHEX/IDE</i>       | C/T | 1.142 | 0.024 | 1.6E-08 | 1.232 | 0.046 | 5.4E-06 | 1.169 | 0.033 | 2.9E-06 | 1.021 | 0.034 | 0.543 |
| rs12497268 | <i>PSMD6</i>          | G/C | 1.073 | 0.031 | 0.024   | 1.072 | 0.099 | 0.483   | 1.087 | 0.036 | 0.020   | 0.965 | 0.059 | 0.546 |
| rs1496653  | <i>UBE2E2</i>         | A/G | 1.128 | 0.029 | 3.9E-05 | 1.172 | 0.086 | 0.064   | 1.150 | 0.034 | 4.1E-05 | 0.969 | 0.052 | 0.549 |
| rs8108269  | <i>GIPR</i>           | G/T | 1.095 | 0.026 | 4.1E-04 | 1.120 | 0.033 | 6.2E-04 | 1.124 | 0.059 | 0.047   | 1.022 | 0.040 | 0.588 |
| rs7845219  | <i>TP53INP1</i>       | T/C | 1.089 | 0.023 | 2.0E-04 | 1.135 | 0.039 | 1.1E-03 | 1.108 | 0.036 | 5.0E-03 | 1.017 | 0.033 | 0.608 |
| rs2447090  | <i>SRR</i>            | A/G | 1.026 | 0.024 | 0.296   | 1.056 | 0.050 | 0.273   | 1.023 | 0.033 | 0.490   | 1.018 | 0.036 | 0.614 |
| rs459193   | <i>ANKRD55</i>        | G/A | 1.141 | 0.027 | 1.1E-06 | 1.273 | 0.072 | 8.7E-04 | 1.155 | 0.033 | 1.1E-05 | 1.023 | 0.046 | 0.618 |
| rs5215     | <i>KCNJ11</i>         | C/T | 1.074 | 0.024 | 2.5E-03 | 1.084 | 0.033 | 0.015   | 1.126 | 0.046 | 0.011   | 0.985 | 0.034 | 0.653 |

|            |                      |     |       |       |         |       |       |         |       |       |         |       |       |       |
|------------|----------------------|-----|-------|-------|---------|-------|-------|---------|-------|-------|---------|-------|-------|-------|
| rs8182584  | <i>PEPD</i>          | T/G | 1.023 | 0.024 | 0.325   | 1.022 | 0.033 | 0.517   | 1.049 | 0.046 | 0.303   | 0.985 | 0.034 | 0.658 |
| rs12970134 | <i>MC4R</i>          | A/G | 1.111 | 0.025 | 3.2E-05 | 1.124 | 0.032 | 3.1E-04 | 1.201 | 0.059 | 1.8E-03 | 0.984 | 0.039 | 0.676 |
| rs10923931 | <i>NOTCH2</i>        | T/G | 1.090 | 0.036 | 0.016   | 1.091 | 0.039 | 0.026   | 1.225 | 0.138 | 0.141   | 0.970 | 0.078 | 0.691 |
| rs4402960  | <i>IGF2BP2</i>       | T/G | 1.155 | 0.024 | 2.1E-09 | 1.195 | 0.033 | 4.6E-08 | 1.225 | 0.050 | 5.3E-05 | 1.014 | 0.036 | 0.697 |
| rs13233731 | <i>KLF14</i>         | G/A | 1.086 | 0.023 | 3.4E-04 | 1.127 | 0.039 | 2.1E-03 | 1.106 | 0.036 | 5.5E-03 | 1.012 | 0.033 | 0.709 |
| rs780094   | <i>GCKR</i>          | C/T | 1.092 | 0.024 | 2.1E-04 | 1.128 | 0.048 | 0.011   | 1.119 | 0.033 | 6.5E-04 | 0.991 | 0.035 | 0.805 |
| rs10203174 | <i>THADA</i>         | C/T | 1.132 | 0.038 | 1.1E-03 | 1.296 | 0.162 | 0.110   | 1.137 | 0.041 | 1.7E-03 | 1.022 | 0.090 | 0.806 |
| rs17791513 | <i>TLE4</i>          | A/G | 1.054 | 0.049 | 0.279   | 1.039 | 0.265 | 0.885   | 1.058 | 0.051 | 0.268   | 0.966 | 0.142 | 0.806 |
| rs4502156  | <i>C2CD4A</i>        | T/C | 1.031 | 0.023 | 0.188   | 1.049 | 0.041 | 0.248   | 1.036 | 0.035 | 0.311   | 1.007 | 0.033 | 0.832 |
| rs849135   | <i>JAZF1</i>         | G/A | 1.113 | 0.023 | 3.0E-06 | 1.160 | 0.039 | 1.2E-04 | 1.148 | 0.036 | 1.6E-04 | 1.007 | 0.032 | 0.837 |
| rs10758593 | <i>GLIS3</i>         | A/G | 1.030 | 0.023 | 0.198   | 1.041 | 0.034 | 0.229   | 1.038 | 0.044 | 0.391   | 1.006 | 0.034 | 0.852 |
| rs17867832 | <i>GCC1</i>          | G/T | 1.002 | 0.042 | 0.962   | 1.003 | 0.045 | 0.941   | 0.978 | 0.206 | 0.915   | 1.015 | 0.112 | 0.893 |
| rs4430796  | <i>HNFB1B (TCF2)</i> | G/A | 1.090 | 0.023 | 1.6E-04 | 1.118 | 0.037 | 2.9E-03 | 1.126 | 0.037 | 1.5E-03 | 0.996 | 0.032 | 0.894 |
| rs2007084  | <i>AP3S2</i>         | A/G | 1.005 | 0.043 | 0.900   | 1.005 | 0.045 | 0.914   | 1.024 | 0.206 | 0.910   | 0.992 | 0.112 | 0.944 |
| rs11063069 | <i>CCND2</i>         | G/A | 1.061 | 0.028 | 0.035   | 1.067 | 0.033 | 0.051   | 1.107 | 0.078 | 0.192   | 0.997 | 0.048 | 0.944 |
| rs12899811 | <i>PRC1</i>          | G/A | 1.043 | 0.025 | 0.089   | 1.050 | 0.032 | 0.132   | 1.070 | 0.055 | 0.220   | 0.997 | 0.038 | 0.945 |
| rs11651052 | <i>HNFB1B (TCF2)</i> | A/G | 1.090 | 0.023 | 2.1E-04 | 1.119 | 0.038 | 2.9E-03 | 1.125 | 0.038 | 2.1E-03 | 0.998 | 0.033 | 0.949 |
