# Supplementary material for: Variants in the FTO and CDKAL1 loci have recessive effects on risk of obesity and type 2 diabetes, respectively
Source: PubMed Central journal article supplement (PMC4869698; doi:10.1007/s00125-016-3908-5), 2016-03-10

**ESM Figure 1.** Quantile-Quantile plot showing the association statistics of SNPs available for genome-wide association testing of deviation from additivity for BMI.  $\lambda$  = genomic control inflation factor.

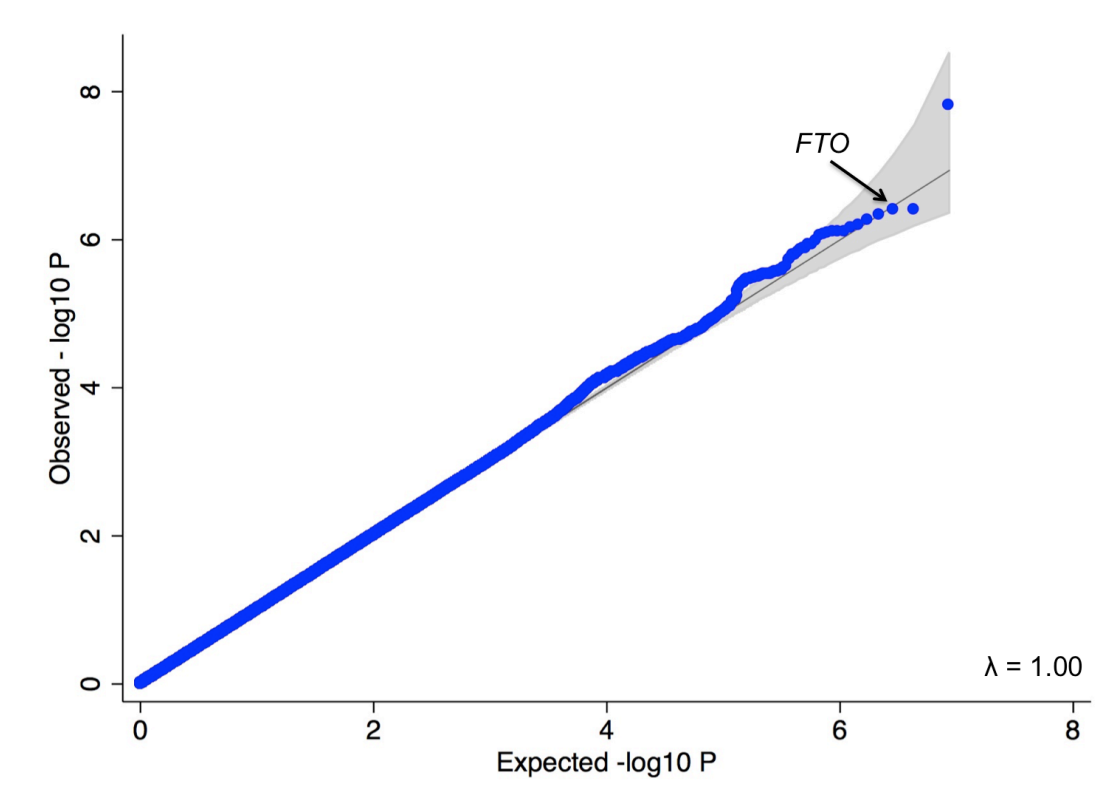

Supplement: 125_2016_3908_MOESM6_ESM.pdf [file 125_2016_3908_MOESM6_ESM.pdf]
