# Supplementary material for: Variants in the FTO and CDKAL1 loci have recessive effects on risk of obesity and type 2 diabetes, respectively
Source: PubMed Central journal article supplement (PMC4869698; doi:10.1007/s00125-016-3908-5), 2016-03-10

**ESM Figure 2.** Association statistics for 72 known BMI variants when analysing BMI on an inverse-normalised scale (X axis) compared to its natural (right-hand skewed) scale (Y axis), under **(A)** additive, **(B)** recessive and **(C)** dominance deviation models.

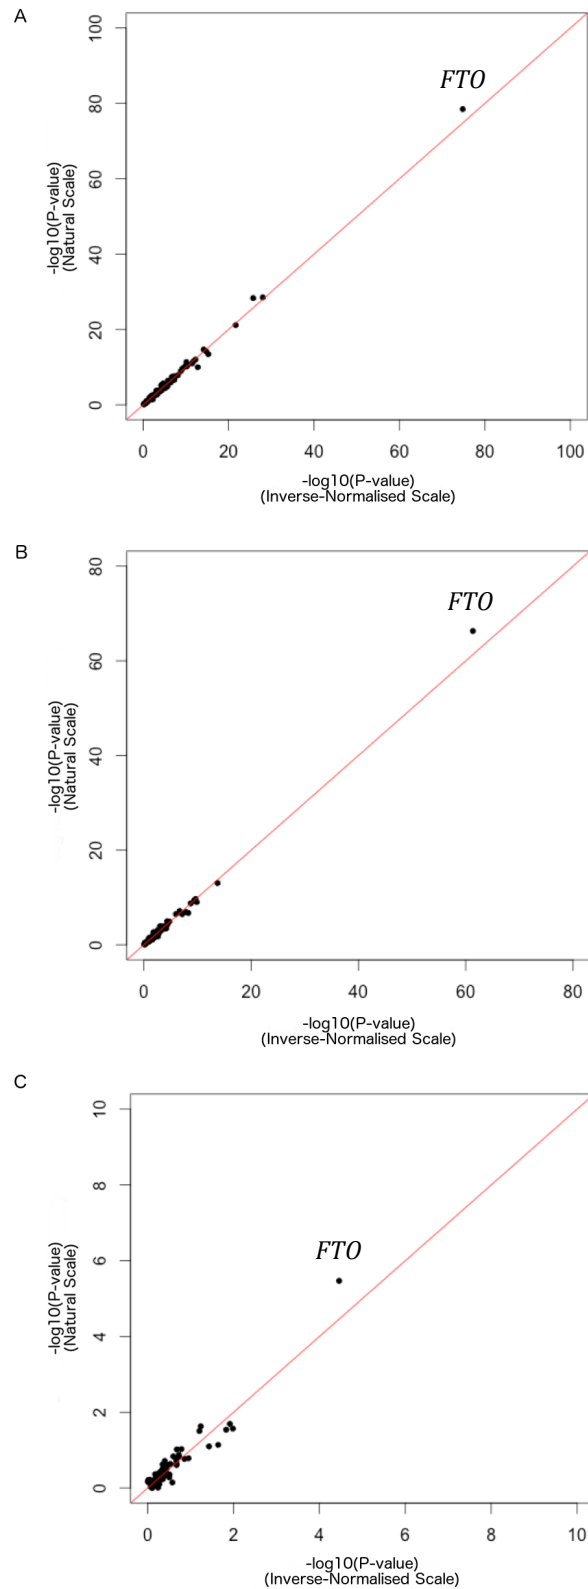

Supplement: 125_2016_3908_MOESM7_ESM.pdf [file 125_2016_3908_MOESM7_ESM.pdf]
