# Supplementary material for: Variants in the FTO and CDKAL1 loci have recessive effects on risk of obesity and type 2 diabetes, respectively
Source: PubMed Central journal article supplement (PMC4869698; doi:10.1007/s00125-016-3908-5), 2016-03-10

**ESM Figure 4.** Forrest plot showing deviation from additivity effects for 72 published BMI SNPs (aligned to the BMI increasing allele under an additive model). Overall  $P$ -value = 0.016 for testing whether BMI increasing alleles are more likely to have non-additive effects with the inclusion of *FTO*. Overall  $P$ -value without *FTO* = 0.072.

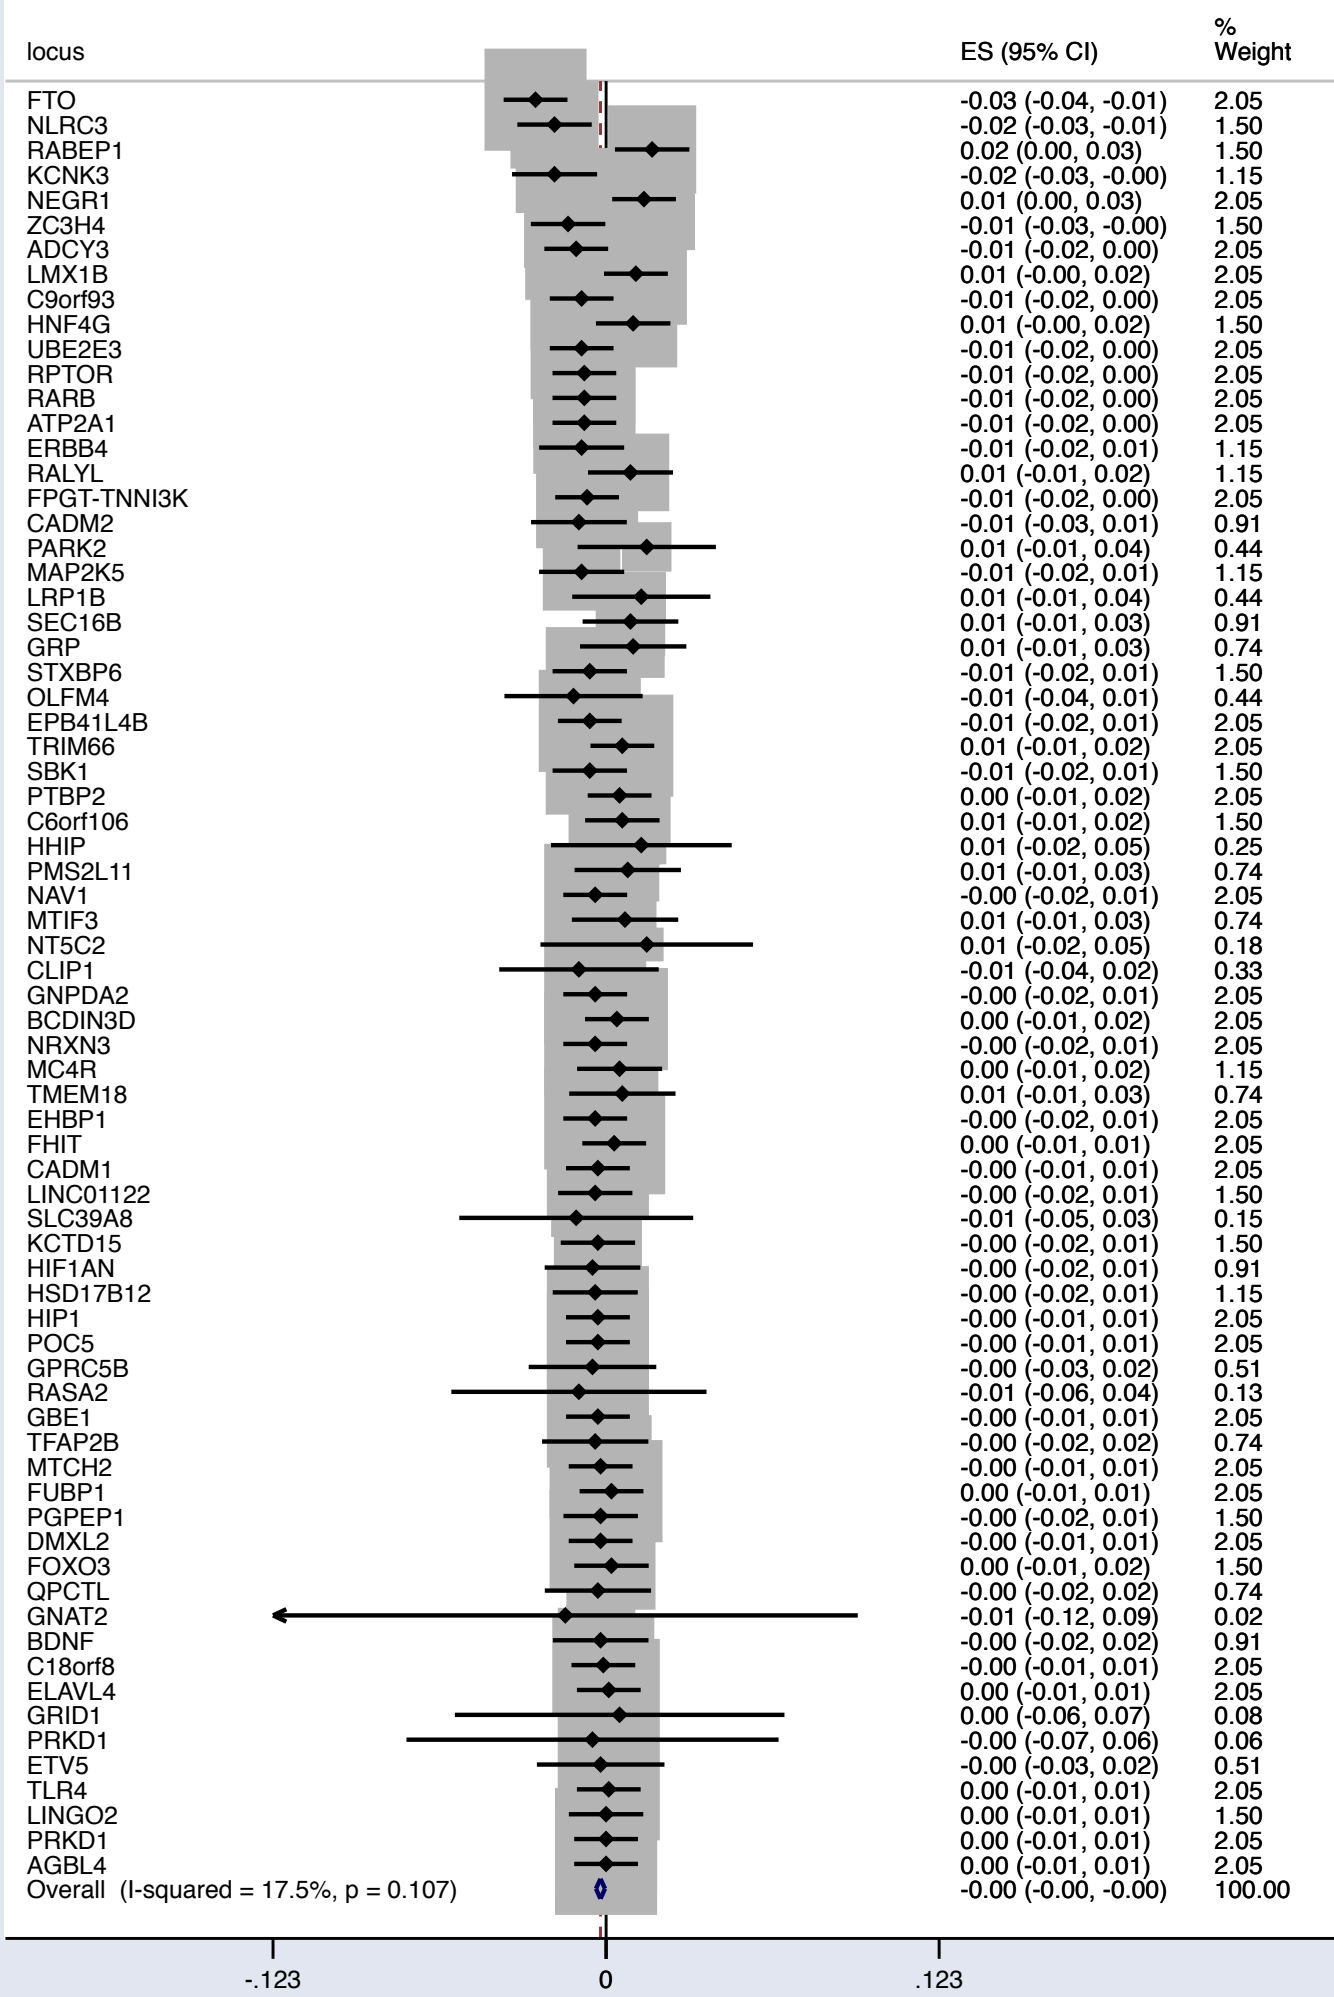

Supplement: 125_2016_3908_MOESM9_ESM.pdf [file 125_2016_3908_MOESM9_ESM.pdf]
