# Supplementary material for: Variants in the FTO and CDKAL1 loci have recessive effects on risk of obesity and type 2 diabetes, respectively
Source: Springer Nature journal article supplement (doi:10.1007/s00125-016-3908-5), 2016-03-09
Supplement: MOESM2 [file 8093624]

**ESM Table 2.** Summary data of 72 SNPs representing previously published BMI loci. 'Chr.' = chromosome, 'HG b37' = human genome build-37, 'HWE P' = Hardy-Weinberg *P*-value based on best-guess genotypes derived from imputation.

| Published BMI Locus | SNP        | Chr. | Position (HG b37) | Effect Allele | Other Allele | N       | Effect Allele Frequency | Best-Guess HWE P | Imputation Quality |
|---------------------|------------|------|-------------------|---------------|--------------|---------|-------------------------|------------------|--------------------|
| <i>AGBL4</i>        | rs657452   | 1    | 49,589,847        | A             | G            | 116,549 | 0.391                   | 0.016            | 0.987              |
| <i>ELAVL4</i>       | rs11583200 | 1    | 50,559,820        | C             | T            | 116,937 | 0.387                   | 0.004            | 0.987              |
| <i>NEGR1</i>        | rs3101336  | 1    | 72,751,185        | C             | T            | 119,688 | 0.600                   | 0.962            | 1.000              |
| <i>FPGT-TNNI3K</i>  | rs12566985 | 1    | 75,002,193        | G             | A            | 118,939 | 0.438                   | 0.226            | 0.995              |
| <i>FUBP1</i>        | rs12401738 | 1    | 78,446,761        | A             | G            | 118,615 | 0.382                   | 0.084            | 0.995              |
| <i>PTBP2</i>        | rs11165643 | 1    | 96,924,097        | T             | C            | 118,771 | 0.593                   | 0.014            | 0.996              |
| <i>GNAT2</i>        | rs17024393 | 1    | 110,154,688       | C             | T            | 119,507 | 0.025                   | 0.352            | 0.989              |
| <i>SEC16B</i>       | rs543874   | 1    | 177,889,480       | G             | A            | 119,688 | 0.209                   | 0.507            | 1.000              |
| <i>NAV1</i>         | rs2820292  | 1    | 201,784,287       | C             | A            | 119,688 | 0.567                   | 0.428            | 1.000              |
| <i>TMEM18</i>       | rs13021737 | 2    | 632,348           | G             | A            | 118,673 | 0.832                   | 0.620            | 0.991              |
| <i>ADCY3</i>        | rs10182181 | 2    | 25,150,296        | G             | A            | 118,496 | 0.486                   | 0.719            | 0.995              |
| <i>KCNK3</i>        | rs11126666 | 2    | 26,928,811        | A             | G            | 118,497 | 0.254                   | 0.383            | 0.995              |
| <i>LINC01122</i>    | rs1016287  | 2    | 59,305,625        | T             | C            | 118,602 | 0.300                   | 0.710            | 0.994              |
| <i>EHBP1</i>        | rs11688816 | 2    | 63,053,048        | G             | A            | 115,250 | 0.548                   | 0.585            | 0.981              |
| <i>LRP1B</i>        | rs2121279  | 2    | 143,043,285       | T             | C            | 118,337 | 0.124                   | 0.873            | 0.987              |
| <i>UBE2E3</i>       | rs1528435  | 2    | 181,550,962       | T             | C            | 119,321 | 0.622                   | 0.676            | 0.997              |
| <i>ERBB4</i>        | rs7599312  | 2    | 213,413,231       | G             | A            | 114,229 | 0.737                   | 0.573            | 0.973              |
| <i>RARB</i>         | rs6804842  | 3    | 25,106,437        | G             | A            | 116,777 | 0.576                   | 1.0E-04          | 0.988              |
| <i>FHIT</i>         | rs2365389  | 3    | 61,236,462        | C             | T            | 117,861 | 0.593                   | 0.345            | 0.993              |
| <i>GBE1</i>         | rs3849570  | 3    | 81,792,112        | A             | C            | 118,926 | 0.347                   | 0.702            | 0.995              |
| <i>CADM2</i>        | rs13078960 | 3    | 85,807,590        | G             | T            | 118,362 | 0.200                   | 0.677            | 0.992              |
| <i>RASA2</i>        | rs16851483 | 3    | 141,275,436       | T             | G            | 119,625 | 0.066                   | 0.925            | 0.999              |
| <i>ETV5</i>         | rs1516725  | 3    | 185,824,004       | C             | T            | 118,998 | 0.864                   | 0.350            | 0.995              |
| <i>GNPDA2</i>       | rs10938397 | 4    | 45,182,527        | G             | A            | 119,688 | 0.434                   | 0.038            | 1.000              |

|                 |            |    |             |   |   |         |       |       |       |
|-----------------|------------|----|-------------|---|---|---------|-------|-------|-------|
| <i>SLC39A8</i>  | rs13107325 | 4  | 103,188,709 | T | C | 119,688 | 0.074 | 0.069 | 1.000 |
| <i>HHIP</i>     | rs11727676 | 4  | 145,659,064 | T | C | 119,688 | 0.903 | 0.805 | 1.000 |
| <i>POC5</i>     | rs2112347  | 5  | 75,015,242  | T | G | 119,688 | 0.640 | 0.071 | 1.000 |
| <i>C6orf106</i> | rs205262   | 6  | 34,563,164  | G | A | 119,212 | 0.268 | 0.763 | 0.997 |
| <i>TFAP2B</i>   | rs2207139  | 6  | 50,845,490  | G | A | 119,545 | 0.169 | 0.727 | 0.999 |
| <i>FOXO3</i>    | rs9400239  | 6  | 108,977,663 | C | T | 118,089 | 0.709 | 0.944 | 0.992 |
| <i>PARK2</i>    | rs13191362 | 6  | 163,033,350 | A | G | 118,665 | 0.876 | 0.884 | 0.990 |
| <i>HIP1</i>     | rs1167827  | 7  | 75,163,169  | G | A | 119,688 | 0.565 | 0.173 | 1.000 |
| <i>PMS2L11</i>  | rs2245368  | 7  | 76,608,143  | C | T | 119,688 | 0.167 | 0.320 | 1.000 |
| <i>HNF4G</i>    | rs17405819 | 8  | 76,806,584  | T | C | 119,360 | 0.702 | 0.934 | 0.998 |
| <i>RALYL</i>    | rs2033732  | 8  | 85,079,709  | C | T | 119,688 | 0.744 | 0.244 | 1.000 |
| <i>C9orf93</i>  | rs4740619  | 9  | 15,634,326  | T | C | 119,197 | 0.553 | 0.735 | 0.998 |
| <i>LINGO2</i>   | rs10968576 | 9  | 28,414,339  | G | A | 119,688 | 0.324 | 0.864 | 1.000 |
| <i>EPB41L4B</i> | rs6477694  | 9  | 111,932,342 | C | T | 117,585 | 0.353 | 0.829 | 0.990 |
| <i>TLR4</i>     | rs1928295  | 9  | 120,378,483 | T | C | 119,680 | 0.571 | 0.403 | 1.000 |
| <i>LMX1B</i>    | rs10733682 | 9  | 129,460,914 | A | G | 109,718 | 0.471 | 0.325 | 0.958 |
| <i>GRID1</i>    | rs7899106  | 10 | 87,410,904  | G | A | 119,064 | 0.049 | 0.853 | 0.986 |
| <i>HIF1AN</i>   | rs17094222 | 10 | 102,395,440 | C | T | 114,710 | 0.206 | 0.935 | 0.969 |
| <i>NT5C2</i>    | rs11191560 | 10 | 104,869,038 | C | T | 119,685 | 0.076 | 0.069 | 1.000 |
| <i>TRIM66</i>   | rs4256980  | 11 | 8,673,939   | G | C | 118,229 | 0.657 | 0.723 | 0.993 |
| <i>BDNF</i>     | rs11030104 | 11 | 27,684,517  | A | G | 119,568 | 0.797 | 0.412 | 0.999 |
| <i>HSD17B12</i> | rs2176598  | 11 | 43,864,278  | T | C | 119,688 | 0.246 | 0.436 | 1.000 |
| <i>MTCH2</i>    | rs3817334  | 11 | 47,650,993  | T | C | 119,688 | 0.408 | 0.417 | 1.000 |
| <i>CADM1</i>    | rs12286929 | 11 | 115,022,404 | G | A | 119,177 | 0.525 | 0.750 | 0.991 |
| <i>BCDIN3D</i>  | rs7138803  | 12 | 50,247,468  | A | G | 119,688 | 0.369 | 0.446 | 1.000 |
| <i>CLIP1</i>    | rs11057405 | 12 | 122,781,897 | G | A | 119,688 | 0.894 | 0.030 | 1.000 |
| <i>MTIF3</i>    | rs9581854  | 13 | 28,017,782  | T | C | 117,920 | 0.179 | 0.028 | 0.986 |
| <i>OLFM4</i>    | rs12429545 | 13 | 54,102,206  | A | G | 117,103 | 0.126 | 0.731 | 0.978 |
| <i>STXBP6</i>   | rs10132280 | 14 | 25,928,179  | C | A | 114,325 | 0.706 | 0.865 | 0.975 |

|                |            |    |            |   |   |         |       |       |       |
|----------------|------------|----|------------|---|---|---------|-------|-------|-------|
| <i>PRKD1</i>   | rs12885454 | 14 | 29,736,838 | C | A | 119,014 | 0.642 | 0.787 | 0.996 |
| <i>PRKD1</i>   | rs11847697 | 14 | 30,515,112 | T | C | 119,688 | 0.044 | 0.391 | 1.000 |
| <i>NRXN3</i>   | rs7141420  | 14 | 79,899,454 | T | C | 115,333 | 0.517 | 0.488 | 0.984 |
| <i>DMXL2</i>   | rs3736485  | 15 | 51,748,610 | A | G | 116,461 | 0.463 | 0.514 | 0.987 |
| <i>MAP2K5</i>  | rs16951275 | 15 | 68,077,168 | T | C | 119,450 | 0.775 | 0.325 | 0.998 |
| <i>NLRC3</i>   | rs758747   | 16 | 3,627,358  | T | C | 114,180 | 0.273 | 0.174 | 0.972 |
| <i>GPRC5B</i>  | rs12446632 | 16 | 19,935,389 | G | A | 119,655 | 0.858 | 0.896 | 1.000 |
| <i>SBK1</i>    | rs2650492  | 16 | 28,333,411 | A | G | 115,534 | 0.294 | 0.983 | 0.981 |
| <i>ATP2A1</i>  | rs3888190  | 16 | 28,889,486 | A | C | 119,259 | 0.403 | 0.585 | 0.998 |
| <i>FTO</i>     | rs1421085  | 16 | 53,800,954 | C | T | 119,688 | 0.402 | 0.938 | 1.000 |
| <i>RABEP1</i>  | rs1000940  | 17 | 5,283,252  | G | A | 119,056 | 0.300 | 0.005 | 0.996 |
| <i>RPTOR</i>   | rs12940622 | 17 | 78,615,571 | G | A | 119,227 | 0.559 | 0.756 | 0.998 |
| <i>C18orf8</i> | rs1808579  | 18 | 21,104,888 | C | T | 119,194 | 0.517 | 0.269 | 0.998 |
| <i>GRP</i>     | rs7243357  | 18 | 56,883,319 | T | G | 118,054 | 0.827 | 0.297 | 0.990 |
| <i>MC4R</i>    | rs6567160  | 18 | 57,829,135 | C | T | 119,099 | 0.234 | 0.473 | 0.997 |
| <i>PGPEP1</i>  | rs17724992 | 19 | 18,454,825 | A | G | 117,156 | 0.735 | 0.125 | 0.983 |
| <i>KCTD15</i>  | rs29941    | 19 | 34,309,532 | G | A | 119,688 | 0.672 | 0.137 | 1.000 |
| <i>QPCTL</i>   | rs2287019  | 19 | 46,202,172 | C | T | 116,603 | 0.822 | 0.129 | 0.979 |
| <i>ZC3H4</i>   | rs3810291  | 19 | 47,569,003 | A | G | 119,688 | 0.677 | 0.198 | 1.000 |
