# Supplementary material for: Variants in the FTO and CDKAL1 loci have recessive effects on risk of obesity and type 2 diabetes, respectively
Source: Springer Nature journal article supplement (doi:10.1007/s00125-016-3908-5), 2016-03-09
Supplement: MOESM3 [file 8093624]

**ESM Table 3.** Summary data of 66 SNPs representing previously published T2D loci. ‘Chr.’ = chromosome, ‘HG b37’ = human genome build-37, ‘HWE P’ = Hardy-Weinberg *P*-value based on best-guess genotypes derived from imputation.

| Published T2D Locus | SNP        | Chr. | Position (HG b37) | Effect Allele | Other Allele | N       | Effect Allele Frequency | Best-Guess HWE P | Imputation Quality |
|---------------------|------------|------|-------------------|---------------|--------------|---------|-------------------------|------------------|--------------------|
| <i>NOTCH2</i>       | rs10923931 | 1    | 120,517,959       | T             | G            | 117,775 | 0.108                   | 0.811            | 1.000              |
| <i>PROX1</i>        | rs2075423  | 1    | 214,154,719       | G             | T            | 115,031 | 0.669                   | 0.360            | 0.988              |
| <i>GCKR</i>         | rs780094   | 2    | 27,741,237        | C             | T            | 117,775 | 0.618                   | 0.372            | 1.000              |
| <i>THADA</i>        | rs10203174 | 2    | 43,690,030        | C             | T            | 117,548 | 0.887                   | 0.841            | 0.998              |
| <i>BCL11A</i>       | rs243088   | 2    | 60,568,745        | T             | A            | 115,701 | 0.452                   | 0.333            | 0.991              |
| <i>RBMS1</i>        | rs7569522  | 2    | 161,346,447       | A             | G            | 113,920 | 0.453                   | 0.967            | 0.984              |
| <i>GRB14</i>        | rs13389219 | 2    | 165,528,876       | C             | T            | 117,536 | 0.606                   | 0.586            | 0.999              |
| <i>IRS1</i>         | rs2943640  | 2    | 227,093,585       | C             | A            | 117,775 | 0.652                   | 0.949            | 1.000              |
| <i>PPARG</i>        | rs1801282  | 3    | 12,393,125        | C             | G            | 117,775 | 0.880                   | 0.168            | 1.000              |
| <i>UBE2E2</i>       | rs1496653  | 3    | 23,454,790        | A             | G            | 117,606 | 0.795                   | 0.535            | 0.999              |
| <i>PSMD6</i>        | rs12497268 | 3    | 64,090,363        | G             | C            | 114,798 | 0.826                   | 0.943            | 0.979              |
| <i>ADAMTS9</i>      | rs6795735  | 3    | 64,705,365        | C             | T            | 117,775 | 0.595                   | 0.366            | 1.000              |
| <i>ADCY5</i>        | rs11717195 | 3    | 123,082,398       | T             | C            | 117,125 | 0.751                   | 0.249            | 0.996              |
| <i>IGF2BP2</i>      | rs4402960  | 3    | 185,511,687       | T             | G            | 117,775 | 0.315                   | 0.579            | 1.000              |
| <i>ST6GAL1</i>      | rs17301514 | 3    | 186,613,409       | A             | G            | 116,082 | 0.104                   | 0.195            | 0.977              |
| <i>MAEA</i>         | rs6819243  | 4    | 1,293,245         | C             | T            | 117,775 | 0.023                   | 0.900            | 1.000              |
| <i>WFS1</i>         | rs4458523  | 4    | 6,289,986         | G             | T            | 117,318 | 0.597                   | 0.368            | 0.998              |
| <i>ANKRD55</i>      | rs459193   | 5    | 55,806,751        | G             | A            | 117,775 | 0.747                   | 0.410            | 1.000              |
| <i>ZBED3</i>        | rs6878122  | 5    | 76,427,311        | G             | A            | 117,266 | 0.319                   | 0.399            | 0.997              |
| <i>CDKAL1</i>       | rs7756992  | 6    | 20,679,709        | G             | A            | 117,775 | 0.265                   | 0.387            | 1.000              |
| <i>ZFAND3</i>       | rs4299828  | 6    | 38,177,667        | A             | G            | 116,536 | 0.803                   | 0.109            | 0.991              |
| <i>KCNK16</i>       | rs3734621  | 6    | 39,304,211        | C             | A            | 117,663 | 0.026                   | 0.689            | 0.993              |
| <i>DGKB</i>         | rs17168486 | 7    | 14,898,282        | T             | C            | 116,961 | 0.172                   | 0.855            | 0.994              |
| <i>JAZF1</i>        | rs849135   | 7    | 28,196,413        | G             | A            | 117,640 | 0.498                   | 0.712            | 0.999              |

|                       |            |    |             |   |   |         |       |       |       |
|-----------------------|------------|----|-------------|---|---|---------|-------|-------|-------|
| <i>GCK</i>            | rs10278336 | 7  | 44,245,363  | A | G | 117,505 | 0.575 | 0.671 | 0.999 |
| <i>GCC1</i>           | rs17867832 | 7  | 126,996,837 | G | T | 114,743 | 0.081 | 0.638 | 0.960 |
| <i>KLF14</i>          | rs13233731 | 7  | 130,437,689 | G | A | 116,963 | 0.505 | 0.216 | 0.997 |
| <i>ANK1</i>           | rs516946   | 8  | 41,519,248  | C | T | 117,775 | 0.764 | 0.533 | 1.000 |
| <i>TP53INP1</i>       | rs7845219  | 8  | 95,937,502  | T | C | 116,753 | 0.504 | 0.342 | 0.997 |
| <i>SLC30A8</i>        | rs3802177  | 8  | 118,185,025 | G | A | 117,775 | 0.689 | 0.020 | 1.000 |
| <i>GLIS3</i>          | rs10758593 | 9  | 4,292,083   | A | G | 117,775 | 0.397 | 0.094 | 1.000 |
| <i>PTPRD</i>          | rs16927668 | 9  | 8,369,533   | T | C | 117,110 | 0.202 | 0.040 | 0.996 |
| <i>CDKN2A/B</i>       | rs10811661 | 9  | 22,134,094  | T | C | 117,775 | 0.825 | 0.912 | 1.000 |
| <i>TLE4</i>           | rs17791513 | 9  | 81,905,590  | A | G | 117,162 | 0.939 | 0.064 | 0.991 |
| <i>TLE1</i>           | rs2796441  | 9  | 84,308,948  | G | A | 117,775 | 0.579 | 0.103 | 1.000 |
| <i>CDC123/CAMK1D</i>  | rs11257655 | 10 | 12,307,894  | T | C | 117,775 | 0.210 | 0.801 | 1.000 |
| <i>VPS26A</i>         | rs12242953 | 10 | 70,865,342  | G | A | 116,956 | 0.936 | 0.013 | 0.987 |
| <i>ZMIZ1</i>          | rs12571751 | 10 | 80,942,631  | A | G | 117,775 | 0.537 | 0.590 | 1.000 |
| <i>HHEX/IDE</i>       | rs1111875  | 10 | 94,462,882  | C | T | 117,775 | 0.590 | 0.793 | 1.000 |
| <i>TCF7L2</i>         | rs7903146  | 10 | 114,758,349 | T | C | 117,775 | 0.289 | 0.989 | 1.000 |
| <i>DUSP8</i>          | rs2334499  | 11 | 1,696,849   | T | C | 115,485 | 0.421 | 0.948 | 0.989 |
| <i>KCNQ1</i>          | rs163184   | 11 | 2,847,069   | G | T | 115,657 | 0.475 | 0.675 | 0.991 |
| <i>KCNJ11</i>         | rs5215     | 11 | 17,408,630  | C | T | 117,775 | 0.359 | 0.693 | 1.000 |
| <i>ARAP1 (CENTD2)</i> | rs1552224  | 11 | 72,433,098  | A | C | 117,775 | 0.845 | 0.834 | 1.000 |
| <i>MTNR1B</i>         | rs10830963 | 11 | 92,708,710  | G | C | 117,775 | 0.275 | 0.549 | 1.000 |
| <i>CCND2</i>          | rs11063069 | 12 | 4,374,373   | G | A | 117,775 | 0.206 | 0.010 | 1.000 |
| <i>KLHDC5</i>         | rs10842994 | 12 | 27,965,150  | C | T | 117,775 | 0.803 | 0.061 | 1.000 |
| <i>HMGA2</i>          | rs2261181  | 12 | 66,212,318  | T | C | 116,532 | 0.095 | 0.853 | 0.986 |
| <i>TSPAN8/LGR5</i>    | rs7955901  | 12 | 71,433,293  | C | T | 115,638 | 0.444 | 0.349 | 0.992 |
| <i>HNF1A (TCF1)</i>   | rs12427353 | 12 | 121,426,901 | G | C | 115,452 | 0.811 | 0.887 | 0.984 |
| <i>SPRY2</i>          | rs1359790  | 13 | 80,717,156  | G | A | 117,775 | 0.711 | 0.392 | 1.000 |
| <i>C2CD4A</i>         | rs4502156  | 15 | 62,383,155  | T | C | 117,775 | 0.560 | 0.249 | 1.000 |
| <i>HMG20A</i>         | rs7177055  | 15 | 77,832,762  | A | G | 117,775 | 0.720 | 0.737 | 1.000 |

|                     |            |    |            |   |   |         |       |       |       |
|---------------------|------------|----|------------|---|---|---------|-------|-------|-------|
| <i>ZFAND6</i>       | rs11634397 | 15 | 80,432,222 | G | A | 117,775 | 0.661 | 0.643 | 1.000 |
| <i>AP3S2</i>        | rs2007084  | 15 | 90,345,335 | A | G | 113,145 | 0.080 | 0.827 | 0.942 |
| <i>PRC1</i>         | rs12899811 | 15 | 91,544,076 | G | A | 117,491 | 0.302 | 0.682 | 0.998 |
| <i>FTO</i>          | rs9936385  | 16 | 53,819,169 | C | T | 116,909 | 0.389 | 0.990 | 0.995 |
| <i>BCAR1</i>        | rs7202877  | 16 | 75,247,245 | T | G | 117,775 | 0.905 | 0.459 | 1.000 |
| <i>SRR</i>          | rs2447090  | 17 | 2,298,974  | A | G | 114,713 | 0.640 | 0.167 | 0.986 |
| <i>HNF1B (TCF2)</i> | rs4430796  | 17 | 36,098,040 | G | A | 117,775 | 0.482 | 0.065 | 1.000 |
| <i>HNF1B (TCF2)</i> | rs11651052 | 17 | 36,102,381 | A | G | 114,720 | 0.476 | 0.361 | 0.984 |
| <i>MC4R</i>         | rs12970134 | 18 | 57,884,750 | A | G | 117,775 | 0.268 | 0.375 | 1.000 |
| <i>CILP2</i>        | rs10401969 | 19 | 19,407,718 | C | T | 117,480 | 0.076 | 0.967 | 0.996 |
| <i>PEPD</i>         | rs8182584  | 19 | 33,909,710 | T | G | 117,775 | 0.374 | 0.379 | 1.000 |
| <i>GIPR</i>         | rs8108269  | 19 | 46,158,513 | G | T | 113,306 | 0.277 | 0.185 | 0.977 |
| <i>HNF4A</i>        | rs4812829  | 20 | 42,989,267 | A | G | 117,775 | 0.159 | 0.906 | 1.000 |
